# Supplementary material for: Femtosecond laser writing of silicon vacancy color centers with specific defect orientations in silicon carbide
Source: Royal Society of Chemistry journal article supplement (doi:10.1039/d5tc00336a), 2025-01-01
Supplement: d5tc00336a1.pdf [file d5tc00336a1.pdf]

## Supplementary Materials

### Spectral Measurements

The spectral data of Group A, not included in the main text, are provided below:

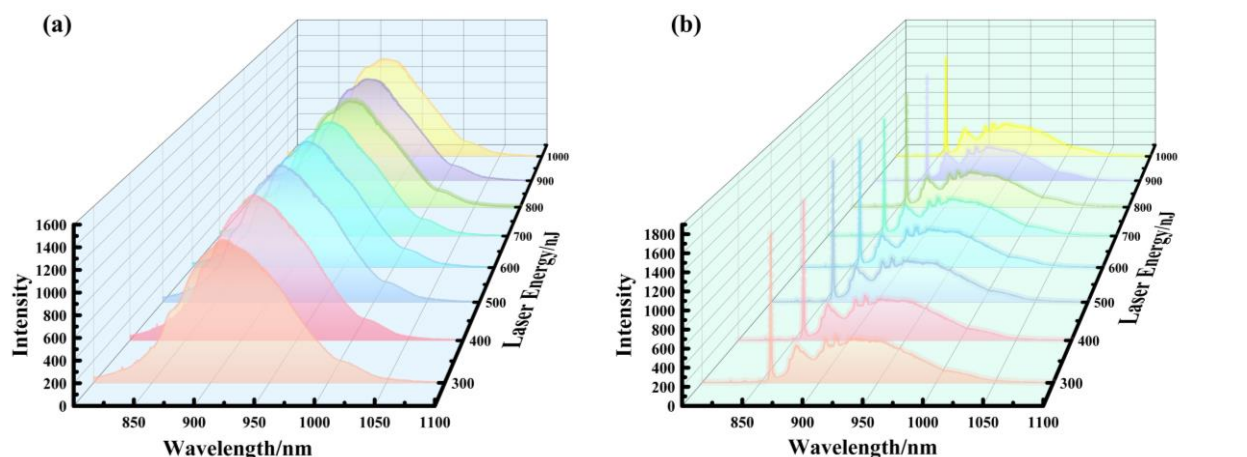

Fig. S1. The room-temperature(a) and low-temperature(b) spectra of all points processed by single pulses in Group A.

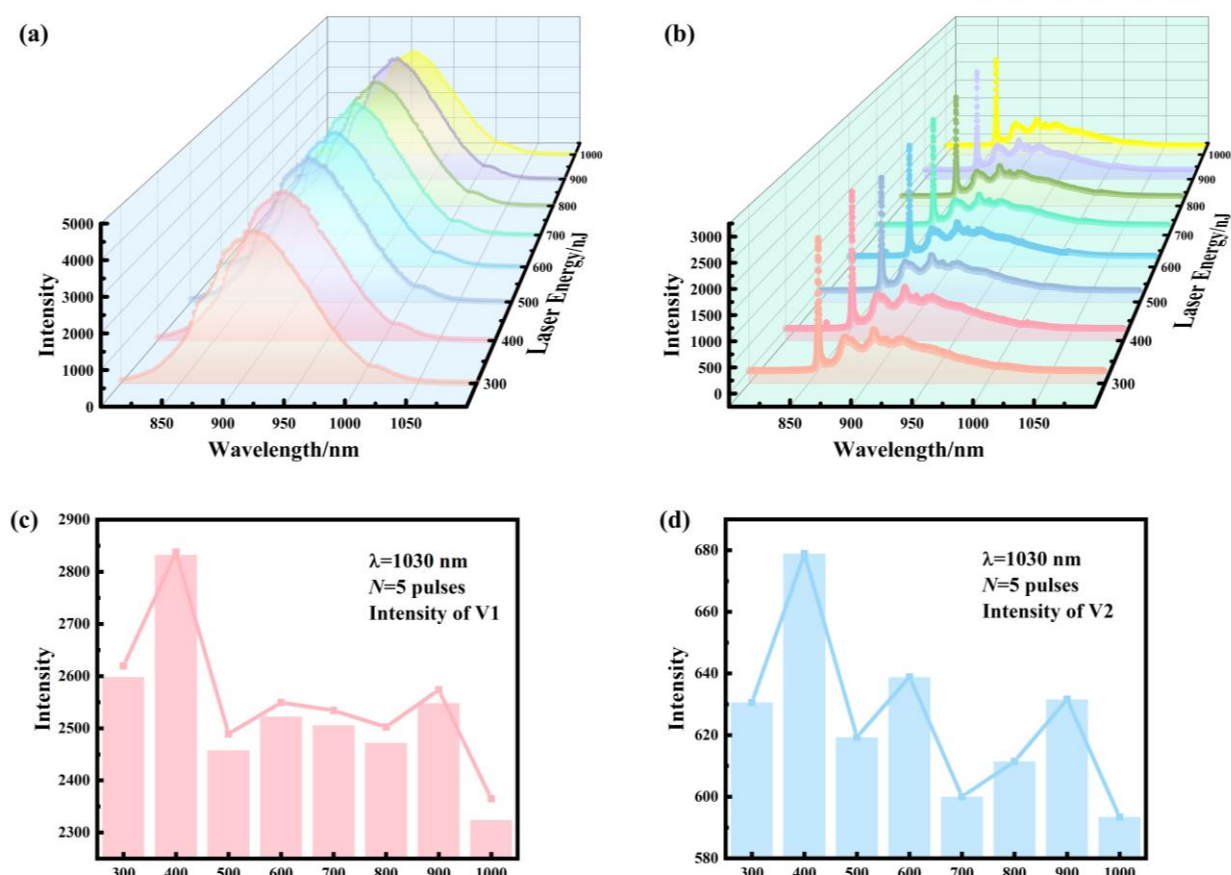

Fig. S2. The room-temperature(a) and low-temperature(b) spectra of the processing points after 5-pulse processing in Group A. The variations of V1(c) and V2(d) extracted from the spectra with pulse energy.

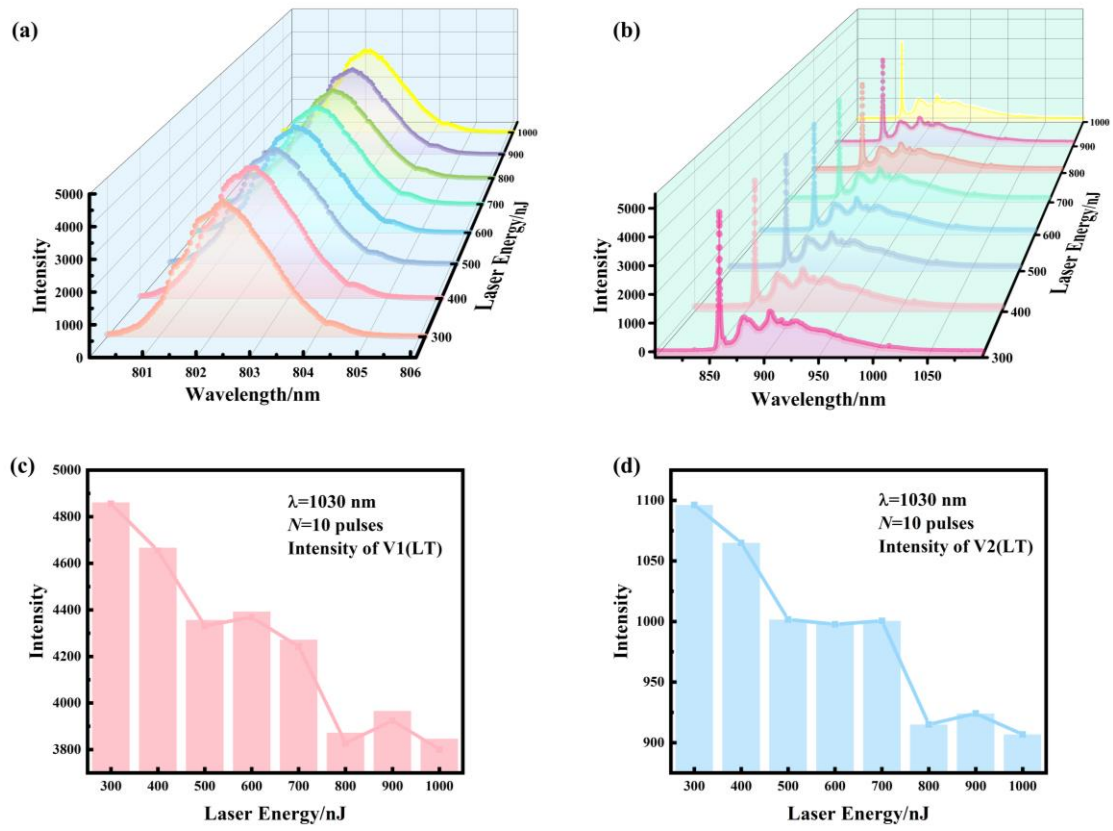

Fig. S3. The room-temperature(a) and low-temperature(b) spectra of the processing points after 10-pulse processing in Group A. The variations of V1(c) and V2(d) extracted from the spectra with pulse energy.

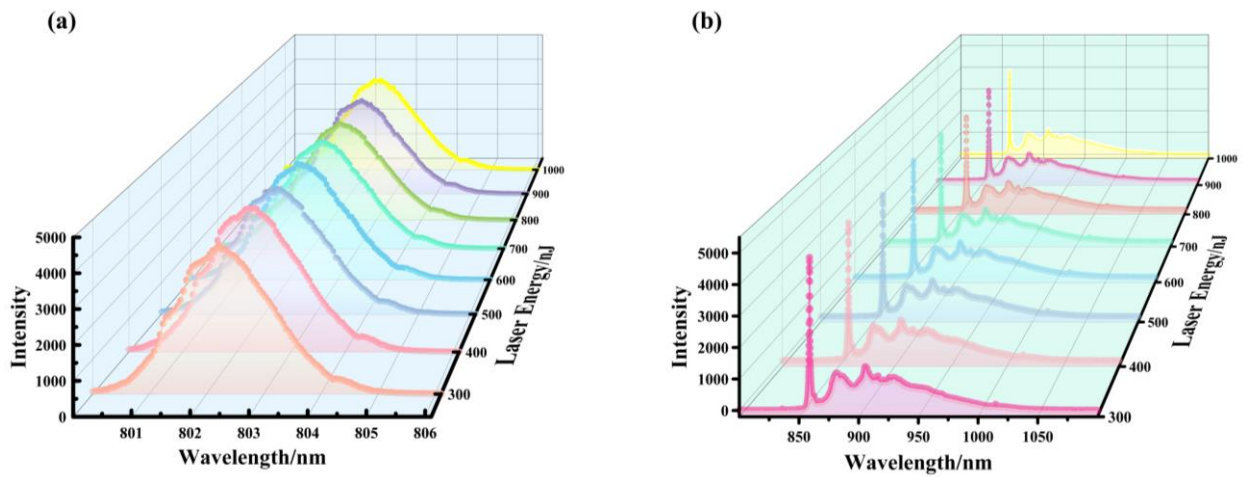

Fig. S4. The room-temperature(a) and low-temperature(b) spectra of all points processed by 15 pulses in Group A.

The remaining spectral results of Group B are also provided:

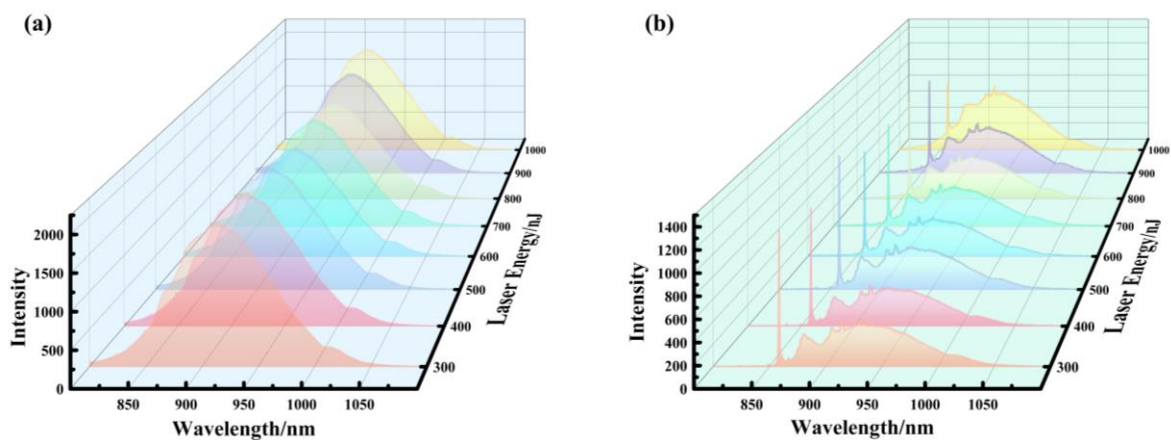

**Fig. S5.** The room-temperature(a) and low-temperature(b) spectra of all points processed by single pulses in Group A.

From the room-temperature and low-temperature spectral results shown in the figures above, it is clear that the method employed in this study achieves a remarkably high success rate in the preparation of color centers.
